# Supplementary material for: Antiparasitic Activity of Oxindolimine–Metal Complexes against Chagas Disease
Source: MDPI journal article supplement (doi:10.3390/inorganics11110420), 2023-10-24
Supplement: s1 [file s1]

## Supplementary Material

### Antiparasitic Activity of Oxindolimine–Metal Complexes against Chagas Disease

Marcelo Cecconi Portes <sup>1,†</sup>, Grazielle Alves Ribeiro <sup>2,†</sup>, Gustavo Levendoski Sabino <sup>1</sup>, Ricardo Alexandre Alves De Couto <sup>1</sup>, Leda Quércia Vieira <sup>2</sup>, Maria Júlia Manso Alves <sup>3</sup> and Ana Maria Da Costa Ferreira <sup>1,\*</sup>

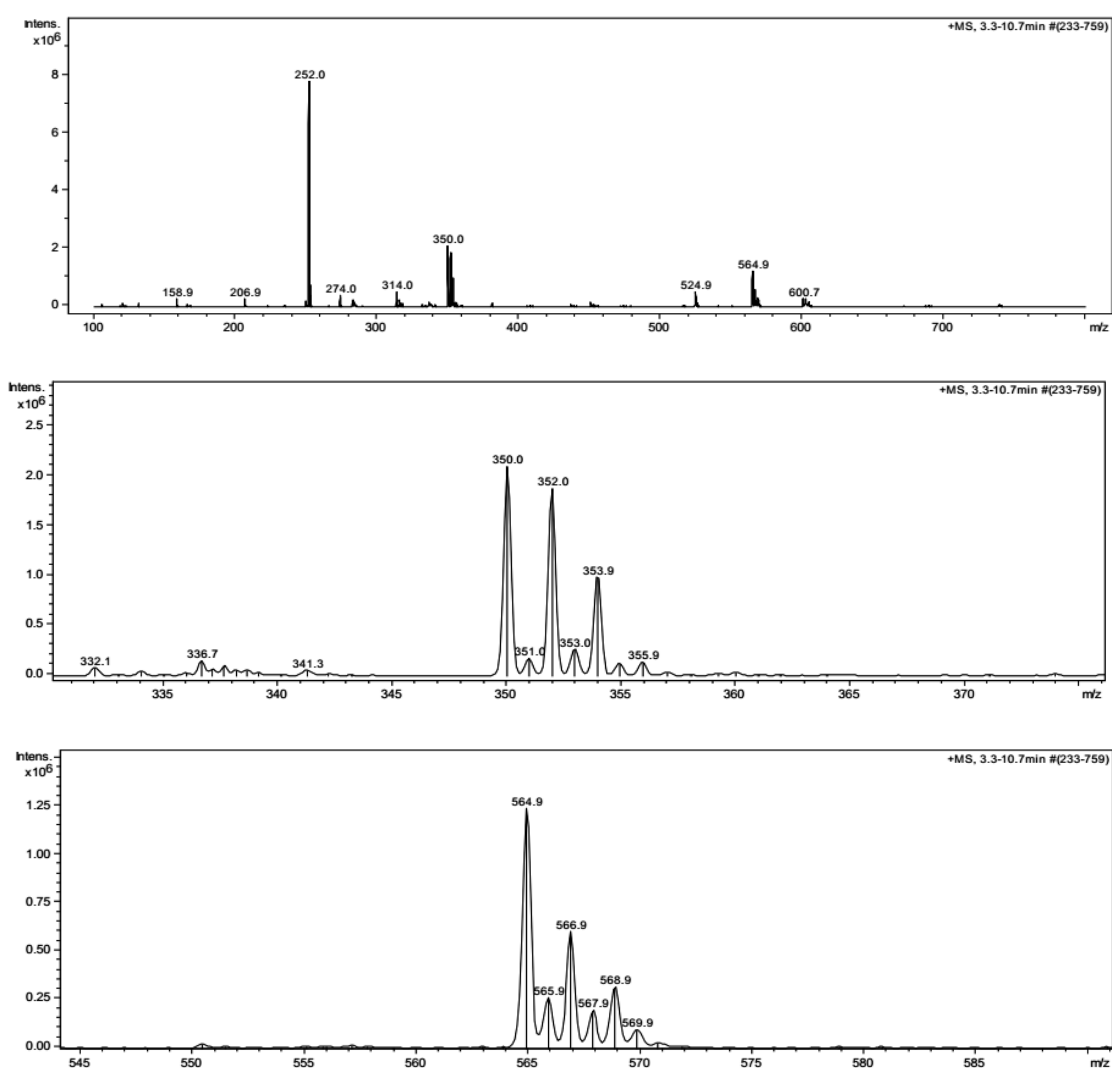

**Figure S1-** Mass spectrogram (ESI-MS) of complex  $[Zn(isaepy)Cl_2]$  **4** in methanol:water (9:1) solution.

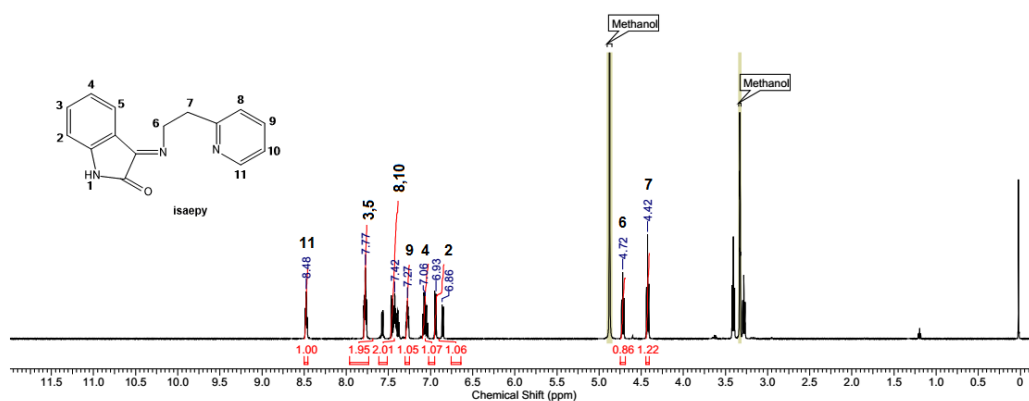

A)  $^1\text{H}$  NMR (300 MHz,  $\text{D}_2\text{O}$ ,  $\delta\text{ppm}$ ): 4.42 (t, 2H,  $\text{CH}_2$ ), 4.72 (t, 2H,  $\text{CH}_2$ ), 6.90 (d, 1H,  $\text{CH}_{\text{ar}}$ ), 7.06 (t, 1H,  $\text{CH}_{\text{ar}}$ ), 7.27 (t, 1H,  $\text{CH}_{\text{ar}}$ ), 7.42 (m, 2H,  $\text{CH}_{\text{ar}}$ ), 7.77 (m, 2H,  $\text{CH}_{\text{ar}}$ ), 8.48 (d, 1H,  $\text{CH}_{\text{ar}}$ ).

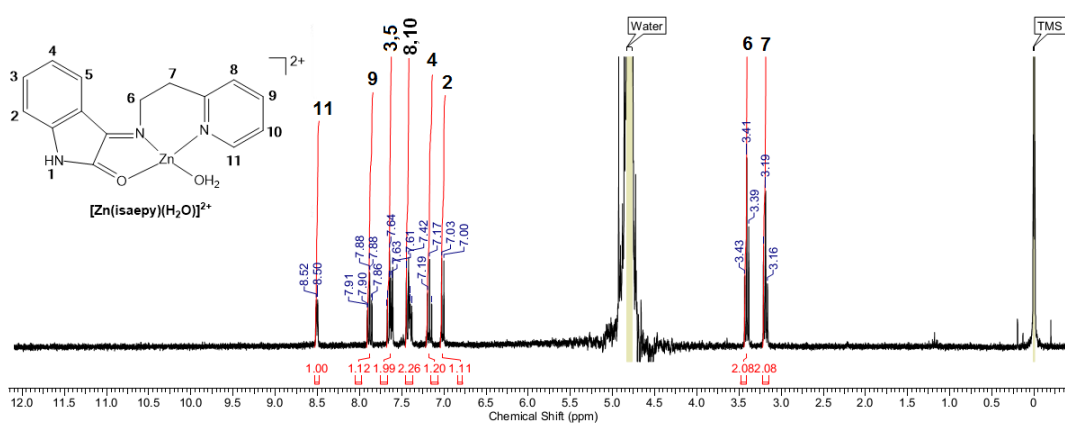

B)  $^1\text{H}$  NMR (300 MHz,  $\text{D}_2\text{O}$ ,  $\delta\text{ppm}$ ): 3.19 (t, 2H,  $\text{CH}_2$ ), 3.41 (t, 2H,  $\text{CH}_2$ ), 7.00 (d, 1H,  $\text{CH}_{\text{ar}}$ ), 7.17 (t, 1H,  $\text{CH}_{\text{ar}}$ ), 7.42 (m, 2H,  $\text{CH}_{\text{ar}}$ ), 7.64 (m, 2H,  $\text{CH}_{\text{ar}}$ ), 7.88 (t, 1H,  $\text{CH}_{\text{ar}}$ ), 8.51 (d, 1H,  $\text{CH}_{\text{ar}}$ ).

**Figure S2.**  $^1\text{H}$  NMR spectra of (A) isaepy free ligand, and (B) complex **4**  $[\text{Zn}(\text{isaepy})\text{Cl}_2]$  in  $\text{D}_2\text{O}$ .
